# Supplementary material
Source: PubMed Central journal article supplement (PMC3749879)

**Multiple Pathways Promote Dynamical Coupling between Catalytic Domains in *Escherichia coli* Prolyl-tRNA Synthetase**

James M. Johnson<sup>†</sup>, Brianne L. Sanford<sup>§</sup>, Alexander M. Strom<sup>†</sup>, Stephanie N. Tadayon<sup>†</sup>, Brent P. Lehman<sup>†</sup>, Arrianna M. Zirbes<sup>†</sup>, Sudeep Bhattacharyya<sup>†\*</sup>, Karin Musier-Forsyth<sup>§\*</sup>, and Sanchita Hati<sup>†\*</sup>

<sup>†</sup>Department of Chemistry, University of Wisconsin–Eau Claire, WI, 54702

<sup>§</sup>Department of Chemistry and Biochemistry, Center for RNA Biology, The Ohio State University, Columbus, OH, 43210

\*To whom correspondence should be addressed: S.B.: phone: 715-836-2278; fax: 715-836-4979; email: [bhattas@uwec.edu](mailto:bhattas@uwec.edu); K.M.F.: phone: 614-292-2021; fax: 614-688-5402; email: [musier@chemistry.ohio-state.edu](mailto:musier@chemistry.ohio-state.edu); S.H.: phone: 715-836-3850; fax: 715-836-4979; email: [hatis@uwec.edu](mailto:hatis@uwec.edu)

## SUPPLEMENTAL FIGURE LEGENDS

Figure S1. Dynamic cross-correlations between the  $C_{\alpha}$  atoms of Ec ProRS obtained from the cluster analysis and PCA. A value of +1.0 was set for strongly correlated motion and is colored red, whereas -1.0 was used for strongly anti-correlated motions and is colored blue. The abbreviations used are: CD, catalytic (aminoacylation) domain; INS, insertion domain; and ACB, anticodon binding domain.

Figure S2. Conserved residues from SCA. A normalized plot of  $\Delta G_i^{\text{stat}}$  vs. position (residue number). A value of 1 indicates 100% conservation over the 452 sequences examined.

Table S1. List of primers used in this study, bold letters represent the sites of mutation.

|    |                                                                   |
|----|-------------------------------------------------------------------|
| 1. | ProRS_D198At: 5'-GCGCCGTACAAGCC <b>GCC</b> ACCGGTTCTATCGGCGG-3'   |
|    | ProRS_D198Ab: 5'-CCGCCGATAGAACCGGT <b>GGCGG</b> CTTGTACGGCGC-3'   |
| 2. | ProRS_E234At: 5'-GCAGCGAACATT <b>GCA</b> CTGGCAGAAGC-3'           |
|    | ProRS_E234Ab: 5'-GCTTCTGCCAGT <b>GCA</b> ATGTTCTGCTGC-3'          |
| 3. | ProRS_H302At: 5'-GCGCGGTGAT <b>GCC</b> GAGCTGAACG-3'              |
|    | ProRS_H302Ab: 5'-CGTTCAGCTC <b>GGC</b> ATCACCGCGC-3'              |
| 4. | ProRS_N305At: 5'-CGAGCT <b>GGCC</b> GAAGTTAAAGC -3'               |
|    | ProRS_N305Ab: 5'-GCTTTAACTTC <b>GGCC</b> AGCTCG- 3'               |
| 5. | ProRS_G412At: 5'-CGTGGTATCGAAGTT <b>GCT</b> CACATCTTCCAGCTGGG-3'  |
|    | ProRS_G412Ab: 5'- CCCAGCTGGAAGATGT <b>GAGCA</b> ACTTCGATACCACG-3' |
| 6. | ProRS_F415At: 5'-GGTCACATC <b>GCCC</b> AGCTGGG-3'                 |
|    | ProRS_F415Ab: 5'-CCCAGCT <b>GGGC</b> GATGTGACC-3'                 |

Fig. S1

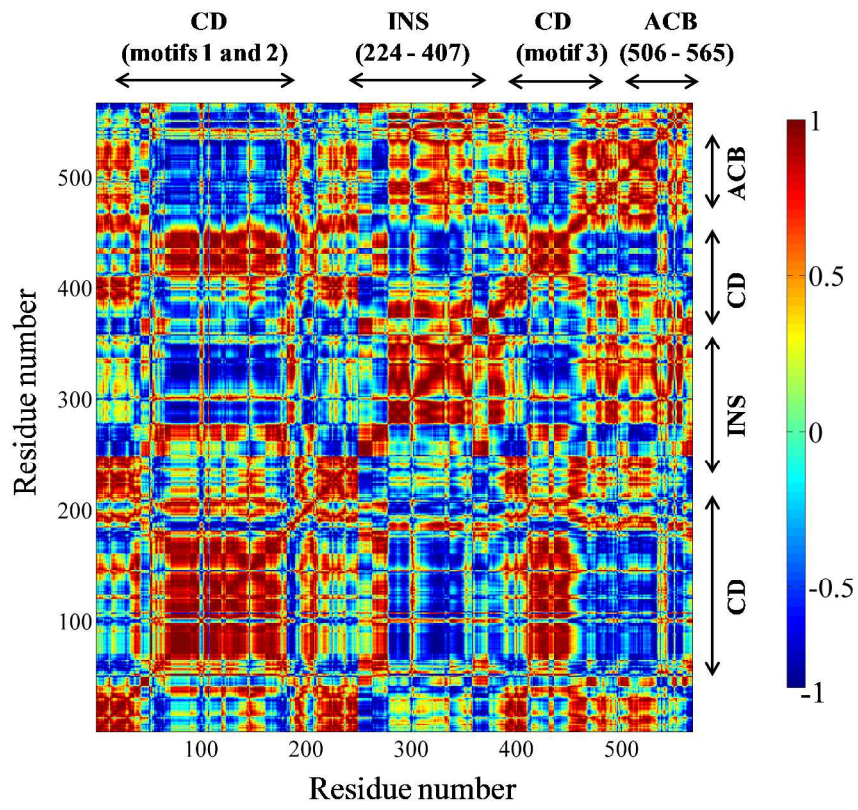

Fig. S2

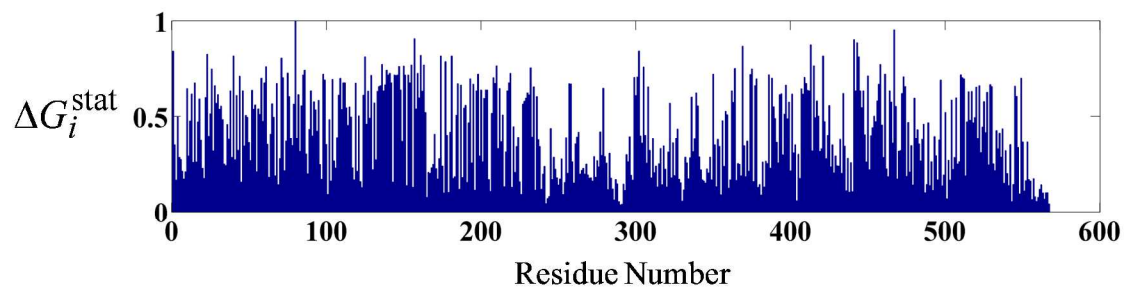

Supplement: NIHMS490879-supplement-1_si_001.pdf [file NIHMS490879-supplement-1_si_001.pdf]
